# Supplementary material for: Altered succinylation of mitochondrial proteins, APP and tau in Alzheimer’s disease
Source: PubMed Central journal article supplement (PMC8748865; doi:10.1038/s41467-021-27572-2), 2022-01-10
Supplement: 41467_2021_27572_MOESM1_ESM.pdf [file 41467_2021_27572_MOESM1_ESM.pdf]

1

Supplementary Information

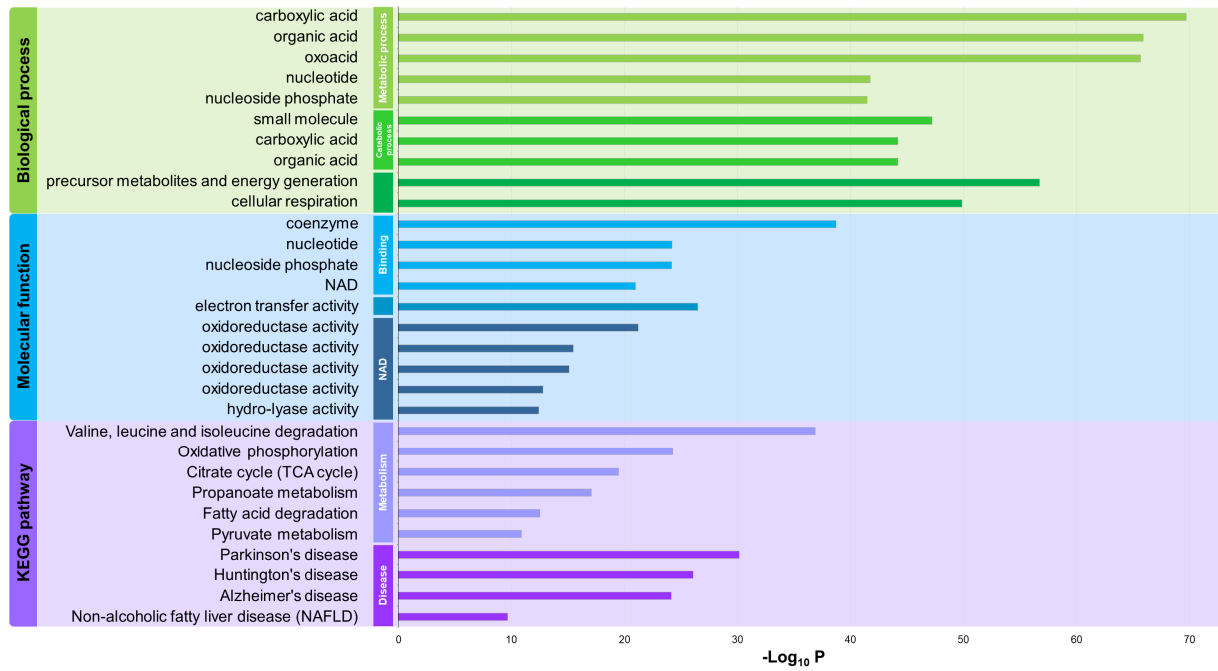

2

3 **Supplementary Figure 1.** Gene ontology functional analysis of human brain succinylome. The graph shows  $p$ -  
 4 values (step-down Bonferroni correction) for the most significant specific terms reflecting biological process  
 5 (green field), molecular function (blue field) and cell component (purple field) (**Supplementary Data 3** for  
 6 detail).

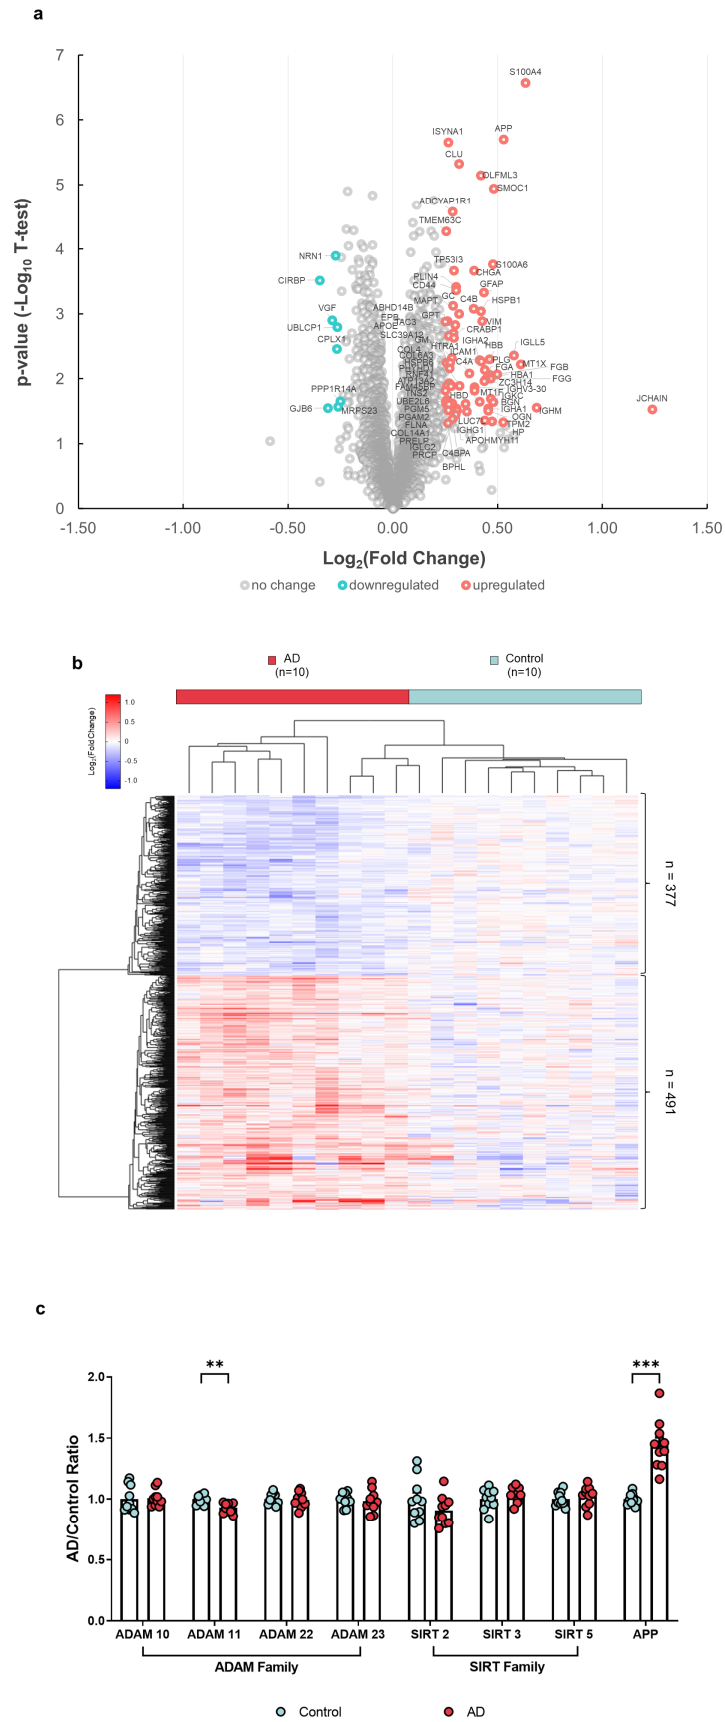

7

8 **Supplementary Figure 2.** Comparison of the brain global proteomics from ten controls and ten patients with  
 9 AD reveal many specific differences.

- 10 **a.** Volcano plot of global proteomic results comparing brains from controls and AD patients. The signal  
11 detection result shows the magnitude (mean expression difference, x-axis) and significance ( $-\log_{10}$  p-value, y-  
12 axis) for brain protein level changes associations of AD. Each spot represents a specific protein. Green symbols  
13 indicate proteins that decline significantly while red symbols indicate proteins that are elevated significantly in  
14 AD brains ( $p < 0.05$ ,  $|\log_2FC| > 0.25$ ).
- 15 **b.** Supervised hierarchical clustering of the 868 proteins whose levels differ ( $p < 0.05$ ) between AD and control.
- 16 **c.** Proteomic analysis indicates that the protein levels of the  $\alpha$ -secretase (ADAM10) are not altered in AD. The  
17 data are shown as the mean with error bars from SEM ( $n = 10$ , \*\*\*:  $p < 0.001$ , \*\*:  $p < 0.01$ , two-way ANOVA  
18 followed by Bonferroni's multiple comparisons test).

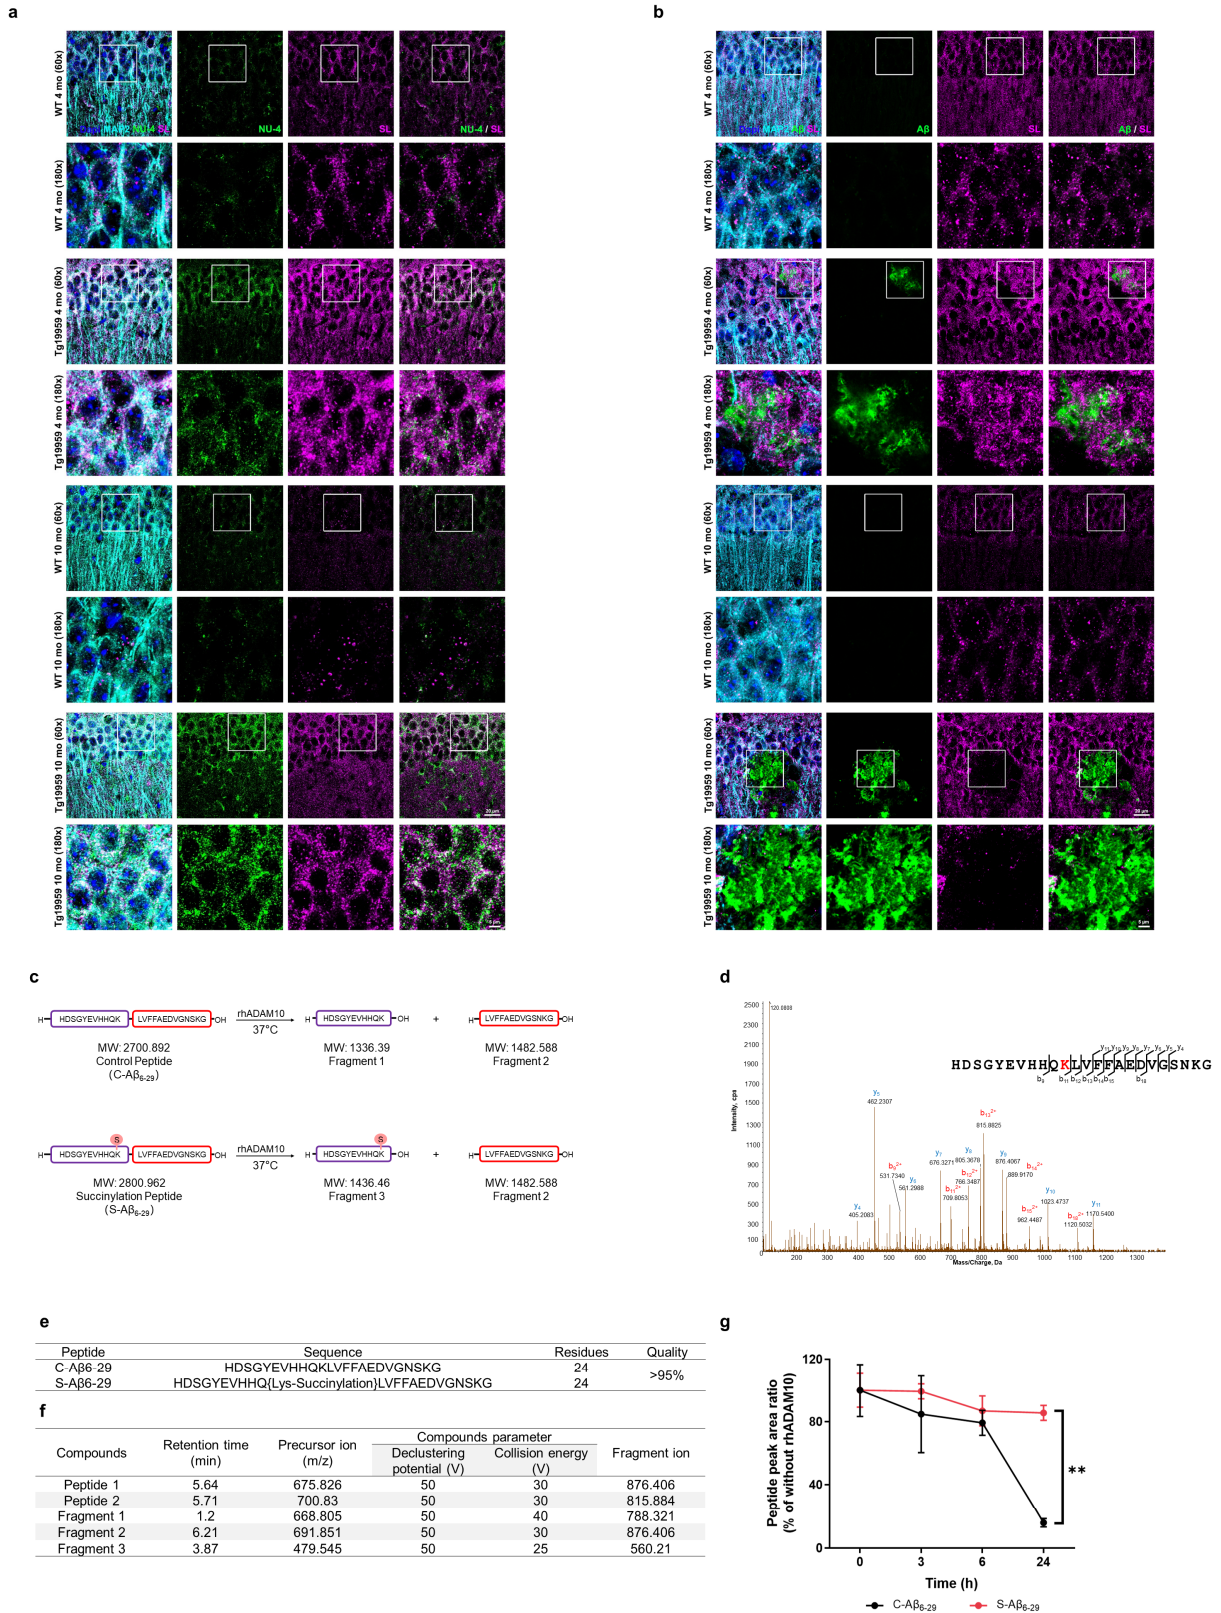

19 **Supplementary Figure 3.** Inhibition of succinylated K612 on A $\beta_{6-29}$  in the  $\alpha$ -cleavage assay and succinylated  
 20 A $\beta_{42}$  using succinyl-CoA *in vitro* and its effect on ThT fluorescence assay.

- 21 **a and b.** High resolution confocal laser microscopy images depicting the co-localization of succinylation and  
22 A $\beta$  pathology in hippocampal CA1 sections from 4-month-old and 10-month-old Tg19959 or WT mice. NU-4  
23 or A $\beta$  plaques (green), pan-succinyl-lysine (magenta), MAP2 (cyan), and DAPI (dark blue).
- 24 **c.** The schematic diagram of  $\alpha$ -cleavage assay for peptides.
- 25 **d.** The MS/MS spectra of the synthetic succinylated A $\beta$ <sub>6-29</sub> peptide used in assay (Succinylation lysine residue is  
26 highlighted in red text).
- 27 **e.** Properties of A $\beta$ <sub>6-29</sub> peptides used in the  $\alpha$ -cleavage MRM assay.
- 28 **f.** Multiple Reaction Monitoring (MRM) parameters used in assay for quantitation with their retention time of  
29 targeted peptides and their fragments.
- 30 **g.** The control A $\beta$ <sub>42</sub> peptide and succinylated A $\beta$ <sub>42</sub> peptide quantitation in the  $\alpha$ -cleavage assay. Peptide peak  
31 area ratio values were calculated and were shown relative to corresponding controls without rhADAM10. Each  
32 sample was run in triplicate (except the 6 h samples were run in duplicate). The data are shown as the mean with  
33 error bars from SEM (\*\*:  $p < 0.01$ , two-way ANOVA followed by Bonferroni's multiple comparisons test).

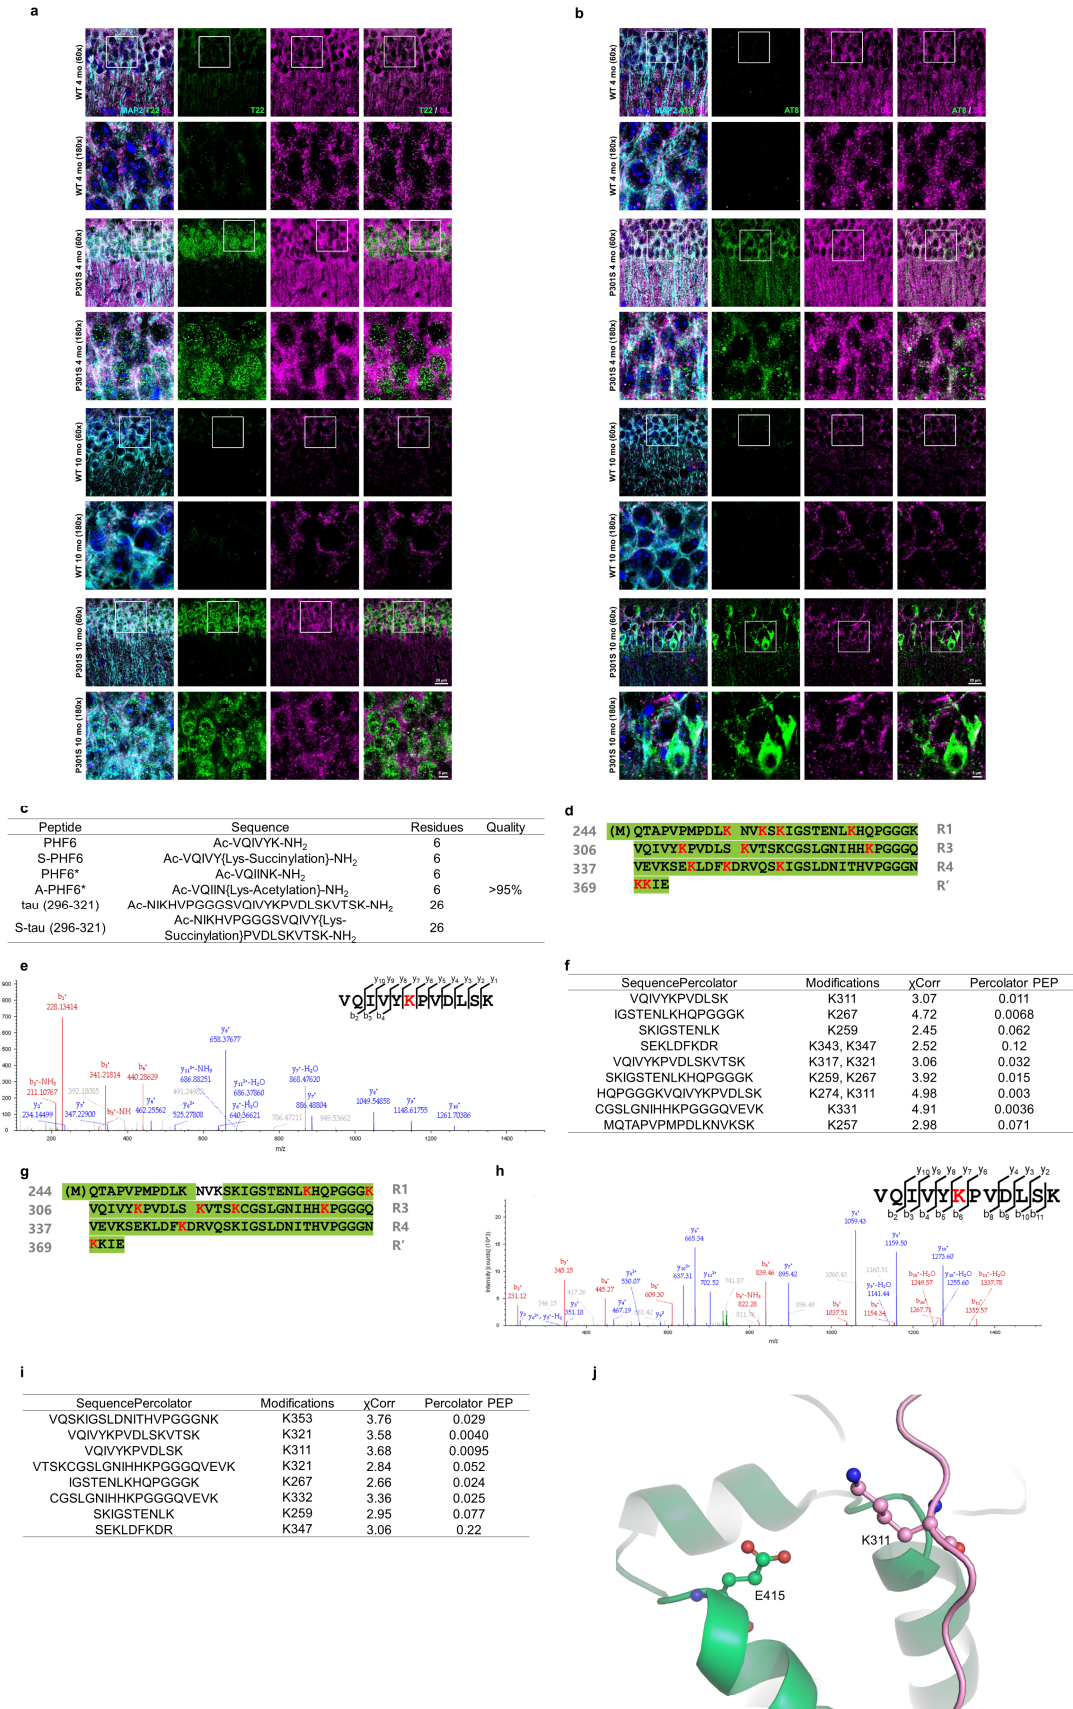

34

35

Supplementary Figure 4. Characterization of succinylated K19 and <sup>15</sup>N K19 using succinyl-CoA *in vitro*.

- 36 **a and b.** Confocal fluorescence micrographs showing succinylation and tau pathology in the hippocampal  
37 CA1 region of 4-month-old and 10-month-old TgP301S or WT mice. Brain sections were stained using  
38 antibodies against T22 or AT8 (green), pan-succinyl-lysine (magenta) and MAP2 (cyan), and counterstained  
39 with DAPI (dark blue).
- 40 **c.** Properties of peptides used in the self-aggregation assay and STD NMR.
- 41 **d.** MS/MS identified sequence of succ-lysines peptides on K19 following succinylation with Succinyl-CoA *in*  
42 *vitro*. Residue numbering is based on the numbering of the longest tau isoform, htau40 (441 residues), and skips  
43 directly from residue 274 to 305 aa as a result of the absence of the second repeat (residues 275-305 aa).  
44 Formatting is used as follows: red, lysines (K) with succinyl group; green box, sequence covered by MS  
45 analysis.
- 46 **e.** MS/MS spectra for identification and quantification of K311 succinylation on K19 following  
47 succinylation *in vitro*. b and y ions indicate peptide backbone fragment ions containing the N and C  
48 terminal, respectively. <sup>2+</sup> indicates doubly charged ions. Succ-Lysine is colored in red.
- 49 **f.** K19 succinylation peptides identified by MS/MS ( $\chi$ Corr  $\geq$  2.11).
- 50 **g.** MS/MS identified sequence of succ-lysines peptides on <sup>15</sup>N K19 following succinylation with Succinyl-CoA  
51 *in vitro*. Residue numbering is based on the numbering of the longest tau isoform, htau40 (441 residues), and  
52 skips directly from residue 274 to 305 aa as a result of the absence of the second repeat (residues 275-305 aa).  
53 Formatting is used as follows: red, lysines (K) with succinyl group; green box, sequence covered by MS  
54 analysis.
- 55 **h.** MS/MS spectra for identification and quantification of K311 succinylation on <sup>15</sup>N K19 following  
56 succinylation *in vitro*. b and y ions indicate peptide backbone fragment ions containing the N and C  
57 terminal, respectively. <sup>2+</sup> indicates doubly charged ions. Succ-Lysine is colored in red.
- 58 **i.** <sup>15</sup>N K19 succinylation peptides identified by MS/MS ( $\chi$ Corr  $\geq$  2.11).
- 59 **j.** Three-dimensional structure of K311 on K19 and E415 on  $\alpha$ -tubulin during the tau-tubulin interactions.
