# Supplementary material for: Altered succinylation of mitochondrial proteins, APP and tau in Alzheimer’s disease
Source: PubMed Central journal article supplement (PMC8748865; doi:10.1038/s41467-021-27572-2), 2022-01-10
Supplement: 41467_2021_27572_MOESM4_ESM.pdf [file 41467_2021_27572_MOESM4_ESM.pdf]

Supplementary Data 1. Criteria for the individual patients who donated the autopsied brains.  
 All samples were from Broca's area (BM-44/45, frontal lobe).

| Normals |           |        |     |      |           |     |                                 |             |
|---------|-----------|--------|-----|------|-----------|-----|---------------------------------|-------------|
| Donor   | Sample ID | cohort | Sex | Age  | PMI (min) | CDR | Mean Plaques (mm <sup>2</sup> ) | Braak Score |
| 1       | 80679     | 1st    | M   | 70   | 606       | 1   | 0                               | 0           |
| 2       | 80680     |        | F   | 69   | 757       | 0.5 | 0                               | 0           |
| 3       | 80688     |        | M   | 78   | 485       | 0   | 0                               | 2           |
| 4       | 80695     |        | F   | 68   | 1155      | 0.5 | 0                               | 0           |
| 5       | 80696     |        | M   | 69   | 225       | 0.5 | 0                               | 0           |
| 6       | 91230     | 2nd    | M   | 64   | 513       | 0   | 0                               | 0           |
| 7       | 91234     |        | F   | 75   | 195       | 0.5 | 0                               | 3           |
| 8       | 91238     |        | M   | 78   | 355       | 0   | 0                               | 0           |
| 9       | 91250     |        | M   | 79   | 545       | 0   | 0                               | 0           |
| 10      | 91254     |        | M   | 75   | 998       | 0   | 0                               | 0           |
| Mean    |           |        |     | 72.5 | 583       | 0.3 | 0                               | 0.5         |
| SEM     |           |        |     | 1.6  | 99        | 0.1 | 0.0                             | 0.3         |

| AD patients |           |        |     |      |           |     |                                 |             |
|-------------|-----------|--------|-----|------|-----------|-----|---------------------------------|-------------|
| Donor       | Sample ID | cohort | Sex | Age  | PMI (min) | CDR | Mean Plaques (mm <sup>2</sup> ) | Braak Score |
| 1           | 80664     | 1st    | M   | 78   | 455       | 2   | 10.85                           | 4           |
| 2           | 80671     |        | F   | 79   | 390       | 3   | 20.48                           | 6           |
| 3           | 80674     |        | M   | 74   | 890       | 3   | 12.79                           | 6           |
| 4           | 80687     |        | M   | 69   | 325       | 3   | 28.59                           | 6           |
| 5           | 80703     |        | M   | 75   | 480       | 2   | 22.47                           | 6           |
| 6           | 91226     | 2nd    | M   | 75   | 883       | 3   | 18.88                           | 6           |
| 7           | 91242     |        | M   | 79   | 480       | 3   | 10.46                           | 6           |
| 8           | 91246     |        | F   | 75   | 285       | 1   | 24.15                           | 6           |
| 9           | 91258     |        | M   | 78   | 310       | 2   | 12.58                           | 6           |
| 10          | 91262     |        | M   | 64   | 430       | 3   | 27.21                           | 6           |
| Mean        |           |        |     | 74.6 | 493       | 2.5 | 18.8                            | 5.8         |
| SEM         |           |        |     | 1.5  | 69        | 0.2 | 2.2                             | 0.2         |
